# Supplementary material
Source: HighWire-hosted journal article supplement (https://ijgc.bmj.com/content/ijgc-2020-001227)
Supplement: inline-supplementary-material-1 [file inline-supplementary-material-1.pdf]

INTERNATIONAL JOURNAL OF  
**GYNECOLOGICAL CANCER**

**Combining novel agents with radiotherapy  
for gynecologic malignancies: beyond the  
era of cisplatin**

**Co-authors:** Lilie Lin, David Lakomy, Matthew Ning,  
Fiona Simpkins, Anuja Jhingran

While platinum-based chemotherapy remains the standard when combined with radiotherapy for locally-advanced gynecologic cancers, novel therapies are under active investigation and show promise.

Drugs that augment immune-activation and DNA-damage show potential to enhance the effects of radiotherapy.

Well-established agents used in other diseases including diabetes and HIV may have synergy with radiotherapy through diverse pleiotropic mechanisms.

Read the full article by searching the DOI: **10.1136/ijgc-2020-001227**
